# Supplementary material
Source: PubMed Central journal article supplement (PMC9588626)
Supplement: NIHMS1833298-supplement-5.pdf [file NIHMS1833298-supplement-5.pdf]

**Supplementary Table 1.** Compound library

| Compound               | Target                   | Supplier                  | Cat no      | Solvent |
|------------------------|--------------------------|---------------------------|-------------|---------|
| 2-chlorodeoxyadenosine | Adenosine deaminase      | AK Scientific             | E997        | DMSO    |
| Acalabrutinib          | BTK                      | Selleck Chemicals LLC     | S8116       | DMSO    |
| Alisertib              | Aurora A                 | Selleck Chemicals LLC     | S1133       | DMSO    |
| AZD6738                | ATR                      | TargetMol                 | T3338       | DMSO    |
| Binimetinib            | MEK1/2                   | Selleck Chemicals LLC     | S7007       | DMSO    |
| Buparlisib             | PI3K                     | Selleck Chemicals LLC     | S2247       | DMSO    |
| Cabozantinib           | VEGFR2                   | LC Laboratories           | C-8901      | DMSO    |
| Chlorambucil           | Alkylating agent         | Pure Chemistry Scientific | 815818      | DMSO    |
| Cobimetinib            | MEK1/2                   | Selleck Chemicals LLC     | S8041       | DMSO    |
| Compound 7n            | PI3K                     | Selleck Chemicals LLC     | S8693       | DMSO    |
| Copanlisib             | PI3K                     | Selleck Chemicals LLC     | S2802       | 5% TFA  |
| Crizotinib             | c-Met, ALK               | LC Laboratories           | C-7900      | DMSO    |
| Cytarabine             | DNA synthesis            | Selleck Chemicals LLC     | S1648       | H2O     |
| Dasatinib              | Abl, Src, c-Kit          | LC Laboratories           | D-3307      | DMSO    |
| Dexamethasone          | Interleukin receptor     | Selleck Chemicals LLC     | S1322       | DMSO    |
| Doramapimod            | p38 MAPK                 | LC Laboratories           | D-2744      | DMSO    |
| Duvelisib              | PI3K                     | Selleck Chemicals LLC     | S7028       | DMSO    |
| Fludarabine            | DNA synthesis, STAT1     | Selleck Chemicals LLC     | S1491       | DMSO    |
| Ibrutinib              | BTK                      | LC Laboratories           | S2680       | DMSO    |
| Idelalisib             | PI3K                     | LC Laboratories           | S2226       | DMSO    |
| JQ1                    | BET bromodomain          | Selleck Chemicals LLC     | S7110       | DMSO    |
| Lenalidomide           | Immunomodulation         | Selleck Chemicals LLC     | S1029       | DMSO    |
| Methylprednisolone     | Glucocorticoid receptor  | Selleck Chemicals LLC     | S1733       | DMSO    |
| Nemoralisib            | PI3K                     | Selleck Chemicals LLC     | S7937       | DMSO    |
| Nutlin 3a              | p53/MDM2                 | Selleck Chemicals LLC     | S8059       | DMSO    |
| Palbociclib            | CDK4/6                   | LC Laboratories           | P-7744      | DMSO    |
| Panobinostat           | HDAC                     | LC Laboratories           | P-3703      | DMSO    |
| PD0325901              | MEK1/2                   | Selleck Chemicals LLC     | S1036       | DMSO    |
| Pictilisib             | PI3K                     | Selleck Chemicals LLC     | S1065       | DMSO    |
| Pilaralisib            | PI3K                     | Selleck Chemicals LLC     | S7645       | DMSO    |
| Pimasertib             | MEK1/2                   | Selleck Chemicals LLC     | S1475       | DMSO    |
| Quizartinib            | FLT3                     | LC Laboratories           | Q-4747      | DMSO    |
| Refametinib            | MEK1/2                   | Selleck Chemicals LLC     | S1089       | DMSO    |
| Ruxolitinib            | JAK1/2                   | LC Laboratories           | R-6600      | DMSO    |
| Selinexor              | CRM1                     | Cayman Europe             | 18127.0     | DMSO    |
| Selumetinib            | MEK1/2                   | Selleck Chemicals LLC     | S1008       | DMSO    |
| SNX-5422               | HSP90                    | Cayman Europe             | 18270.0     | DMSO    |
| Sorafenib              | Raf-1, B-Raf and VEGFR-2 | LC Laboratories           | S-8599      | DMSO    |
| Trametinib             | MEK1/2                   | LC Laboratories           | T-8123      | DMSO    |
| U0126                  | MEK1/2                   | Selleck Chemicals LLC     | S1102       | DMSO    |
| Umbralisib             | PI3K                     | MedChemTronica            | HY-12279    | DMSO    |
| Valproic acid          | Histone deacetylase      | ENAMINE Ltd.              | Z1511532065 | DMSO    |
| Vandetanib             | VEGFR2/3, EGFR           | LC Laboratories           | V-9402      | DMSO    |
| Vemurafenib            | B-Raf <sup>V600E</sup>   | LC Laboratories           | V-2800      | DMSO    |
| Venetoclax             | Bcl-2                    | Selleck Chemicals LLC     | S8048-5MG   | DMSO    |
| ZSTK474                | PI3K                     | Selleck Chemicals         | S1072       | DMSO    |
