# Supplementary material
Source: PubMed Central journal article supplement (PMC9588626)

Supplementary Figure 1

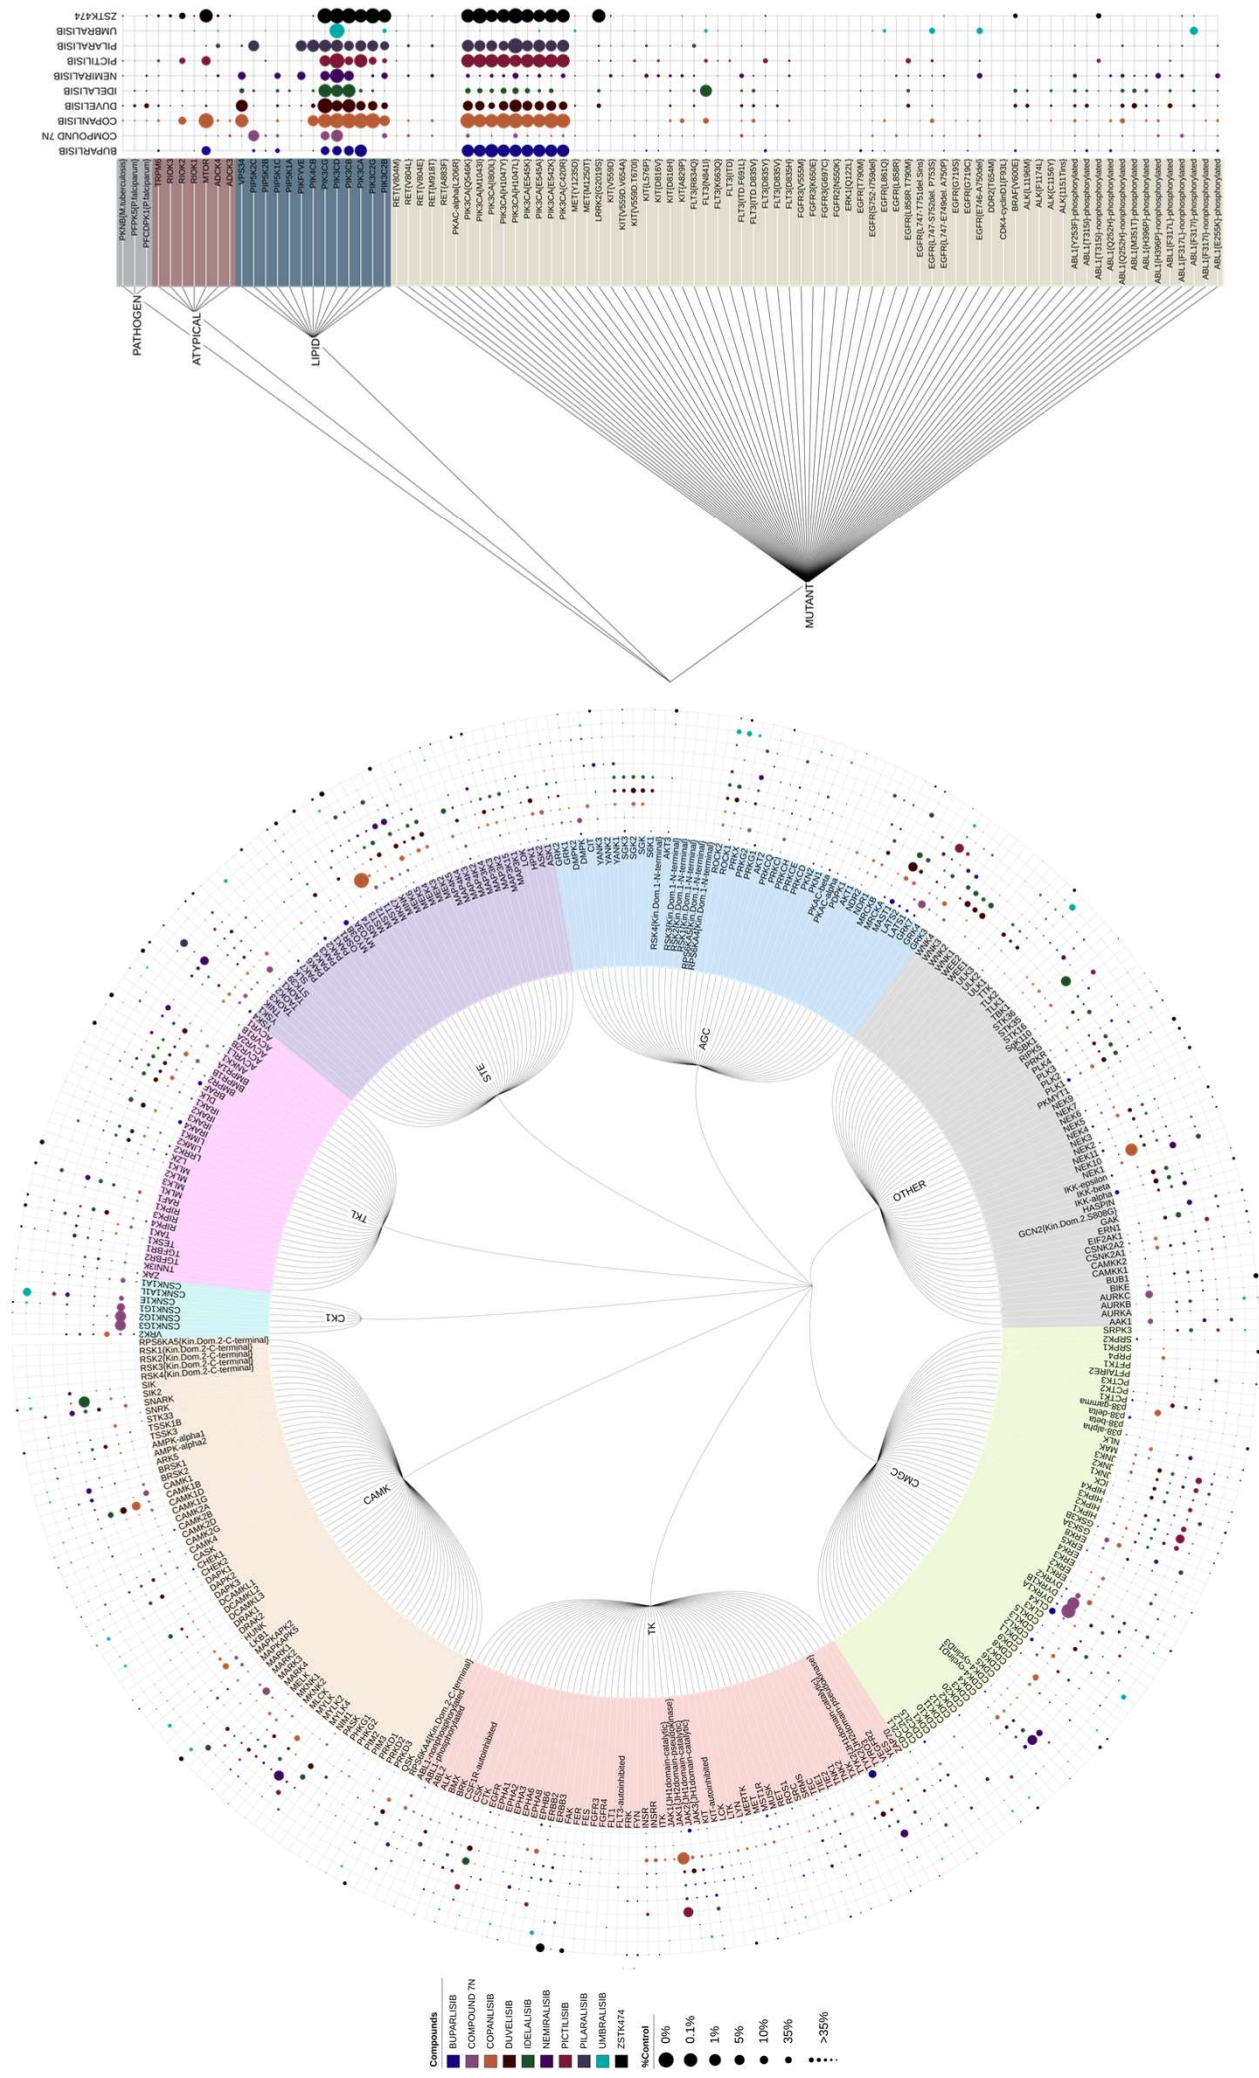

Supplement: NIHMS1833298-supplement-1.pdf [file NIHMS1833298-supplement-1.pdf]

# Supplementary Figure 4

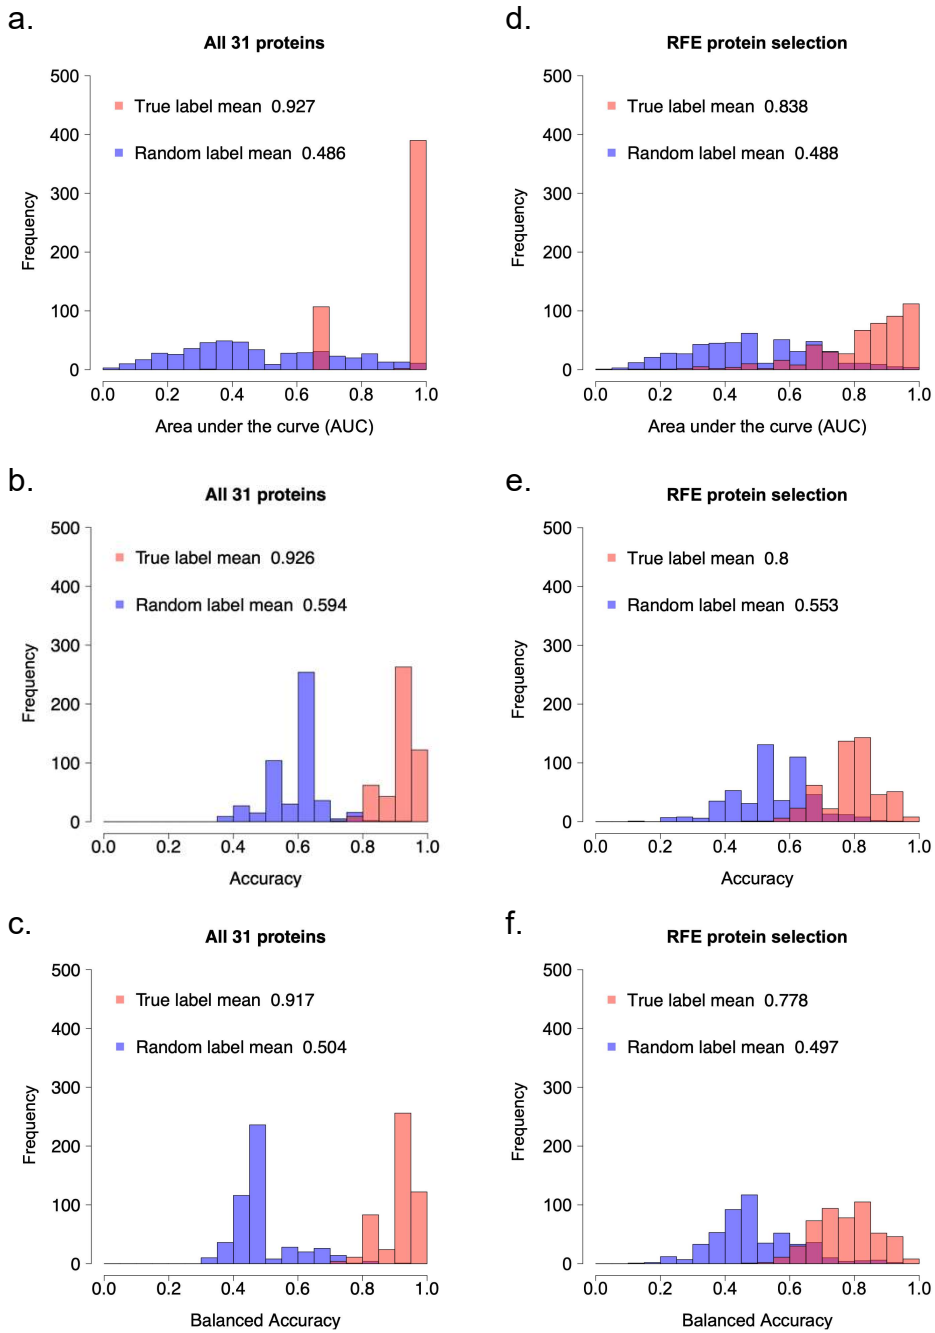

Supplement: NIHMS1833298-supplement-4.pdf [file NIHMS1833298-supplement-4.pdf]
